# Supplementary material for: Toxic Effects of Arsenic on Four Freshwater Aquatic Species and Its Transformation Metabolism in Crucian Carp (Carassius auratus)
Source: MDPI journal article supplement (doi:10.3390/toxics12030221), 2024-03-17
Supplement: s1 [file s1]

**Table S1.** Operation parameters of HPLC-ICP-MS (Agilent 7500 cx).

| ICP-MS conditions (optimized daily) |                          | HPLC conditions    |                                                                                         |
|-------------------------------------|--------------------------|--------------------|-----------------------------------------------------------------------------------------|
| RF power                            | 1500 W                   | Flow rate          | Isocratic, 0.8 mL·min <sup>-1</sup>                                                     |
| Reflected power                     | <15 W                    | Injection volume   | 100 µL                                                                                  |
| Plasma gas flow rate                | 15 L·min <sup>-1</sup>   | Analytical column  | PRP-X100 (4.1 mm×250 mm×10 µm. PEEK), Hamilton                                          |
| Nebulizer gas flow rate             | 0.98 L·min <sup>-1</sup> | Mobile phase       | 50 mM NH <sub>4</sub> (CO <sub>3</sub> ) <sub>2</sub> ; 0.2 mM EDTA, 1% MetOH. pH = 8.5 |
| Auxiliary gas flow rate             | 0.24 L·min <sup>-1</sup> | Total elution time | 13 min                                                                                  |
| Collision gas He                    | 4.0 mL·min <sup>-1</sup> |                    |                                                                                         |
| Makeup Gas                          | 0.15 L·min <sup>-1</sup> |                    |                                                                                         |
| Nebulizer Pump                      | 0.10 rps                 |                    |                                                                                         |
| Uptake Speed                        | 0.40 rps                 |                    |                                                                                         |
| Uptake Time                         | 45 s                     |                    |                                                                                         |
| Stabilization Time                  | 30 s                     |                    |                                                                                         |
| Acquisition                         | Spectrum(Multi<br>Tune)  |                    |                                                                                         |
| Peak Pattern                        | Full Quant(3)            |                    |                                                                                         |

**Table S2.** Summary of analyte masses, elements for internal standard method (ISTD), analytical conditions for octopole reaction system (ORS), correlation coefficient of standard curve(R), limits of detection (LODs) and results of quality control for study elements.

| Analyte | Isotope | ISTD             | ORS    | R      | LOD1<br>( $\mu\text{g}\cdot\text{kg}^{-1}$ ) | LOD2<br>( $\mu\text{g}\cdot\text{L}^{-1}$ ) | RSD (%) | Nominal values<br>( $\text{mg}\cdot\text{kg}^{-1}$ ) | Found value<br>( $\text{mg}\cdot\text{kg}^{-1}$ ) | Recovery (%) |
|---------|---------|------------------|--------|--------|----------------------------------------------|---------------------------------------------|---------|------------------------------------------------------|---------------------------------------------------|--------------|
| As      | 75      | $^{72}\text{Ge}$ | He     | 0.9999 | 3.0                                          | 0.50                                        | 8.16    | $4.8 \pm 0.3^{\text{a}}$                             | $4.66 \pm 0.21$                                   | 92.8-101.5   |
| As(III) | /       | /                | No gas | 0.9997 | 4.5                                          | 0.27                                        | 5.29    | $0.05^{\text{b}}$                                    | $0.0497 \pm 0.0020$                               | 95.5-103.6   |
| As(V)   | /       | /                | No gas | 0.9998 | 5.0                                          | 0.57                                        | 4.69    | $0.05^{\text{b}}$                                    | $0.0455 \pm 0.0031$                               | 85.2-96.8    |
| DMA     | /       | /                | No gas | 0.9985 | 3.2                                          | 0.64                                        | 6.68    | $0.340 \pm 0.051^{\text{a}}$                         | $0.27 \pm 0.023$                                  | 72.5-86.3    |
| MMA     | /       | /                | No gas | 0.9998 | 1.5                                          | 0.61                                        | 3.58    | $0.05^{\text{b}}$                                    | $0.0497 \pm 0.0032$                               | 93.1-105.8   |

LOD1 represents the detection limit of arsenic species in crucian carp tissues, while LOD2 represents the detection limit of arsenic species in water.

The data are represented as means  $\pm$  standard deviation.

<sup>a</sup>: BCR-627 tuna tissue, <sup>b</sup>: Spiked test sample in  $0.050 \text{ mg}\cdot\text{kg}^{-1}$

**Table.S3.** Acute toxicity test of inorganic arsenic solution concentration (mg·L<sup>-1</sup>), n = 4.

| Group                    | Elements | Blank<br>Control<br>(µg·L <sup>-1</sup> ) | Test 1 | Test 2 | Test 3 | Test 4 | Test 5 | Test 6 | Spiked test<br>sample<br>(µg·L <sup>-1</sup> ) |
|--------------------------|----------|-------------------------------------------|--------|--------|--------|--------|--------|--------|------------------------------------------------|
| Initial<br>concentration | As(III)  | ND                                        | 1.02   | 2.14   | 4.75   | 10.41  | 22.88  | 50.44  | 10.0                                           |
|                          | As(III)  | ND                                        | 0.97   | 2.36   | 4.93   | 10.43  | 22.15  | 52.02  | 9.72                                           |
|                          | As(III)  | ND                                        | 1.01   | 2.11   | 4.82   | 10.50  | 23.49  | 48.96  | 9.46                                           |
|                          | As(III)  | ND                                        | 1.00   | 2.20   | 4.83   | 10.45  | 22.84  | 50.47  | 10.5                                           |
| End (12H)                | As(III)  | ND                                        | 0.96   | 2.22   | 4.69   | 10.32  | 22.1   | 50.05  | 10.0                                           |
|                          | As(III)  | ND                                        | 0.97   | 2.13   | 4.85   | 10.29  | 21.59  | 48.71  | 9.28                                           |
|                          | As(III)  | ND                                        | 0.99   | 2.1    | 4.44   | 10.44  | 21.85  | 47.52  | 9.39                                           |
|                          | As(III)  | ND                                        | 0.97   | 2.15   | 4.66   | 10.35  | 21.85  | 48.76  | 10.3                                           |
| Initial<br>concentration | As(V)    | ND                                        | 21.05  | 32.01  | 50.99  | 80.36  | 130.6  | 210.54 | 91.0                                           |
|                          | As(V)    | ND                                        | 20.52  | 31.05  | 52.37  | 78.25  | 122.3  | 208.79 | 98.7                                           |
|                          | As(V)    | ND                                        | 19.88  | 32.06  | 49.78  | 77.31  | 129.5  | 203.54 | 103                                            |
|                          | As(V)    | ND                                        | 20.48  | 31.71  | 51.05  | 78.64  | 127.47 | 207.62 | 104                                            |
| End (12H)                | As(V)    | ND                                        | 19.88  | 31.56  | 51.33  | 80.1   | 128.2  | 199.2  | 95.5                                           |
|                          | As(V)    | ND                                        | 20.37  | 30.31  | 48.25  | 78.98  | 120.9  | 210.6  | 92.8                                           |
|                          | As(V)    | ND                                        | 20.22  | 30.98  | 49.76  | 79.22  | 122.3  | 198.7  | 103                                            |
|                          | As(V)    | ND                                        | 20.16  | 30.95  | 49.78  | 79.43  | 123.8  | 202.8  | 95.8                                           |

ND: not detectable.
